# Supplementary material for: Loss-of-function myostatin mutation increases insulin sensitivity and browning of white fat in Meishan pigs
Source: PubMed Central journal article supplement (PMC5471021; doi:10.18632/oncotarget.16822), 2017-04-04
Supplement: oncotarget-08-34911-s001.pdf [file oncotarget-08-34911-s001.pdf]

## Loss-of-function myostatin mutation increases insulin sensitivity and browning of white fat in Meishan pigs

### Supplementary Materials

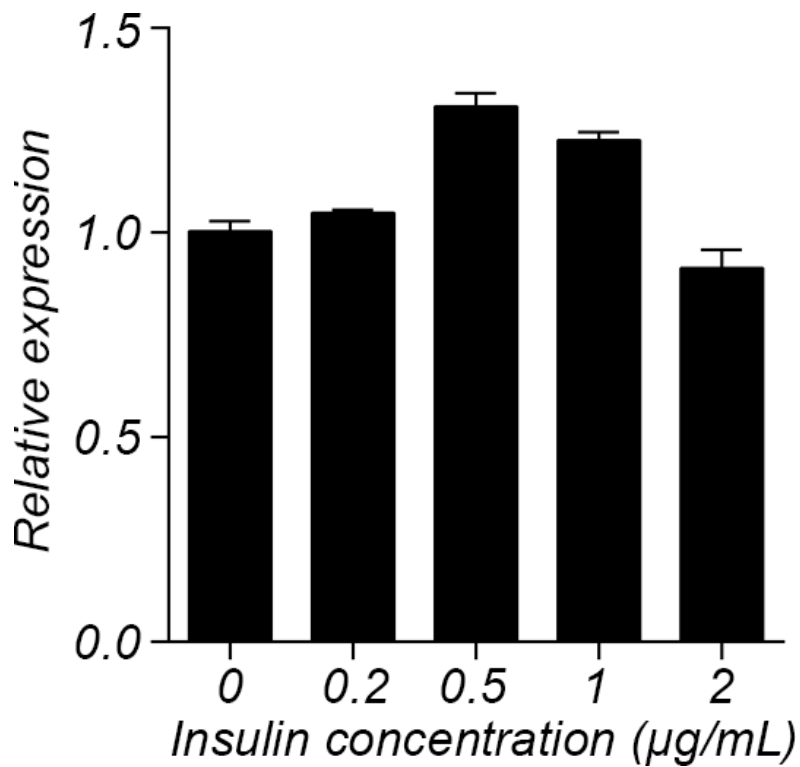

Supplementary Figure 1: RT-PCR analysis of InsR in WT porcine primary myoblasts stimulated with different insulin concentrations (µg/mL).

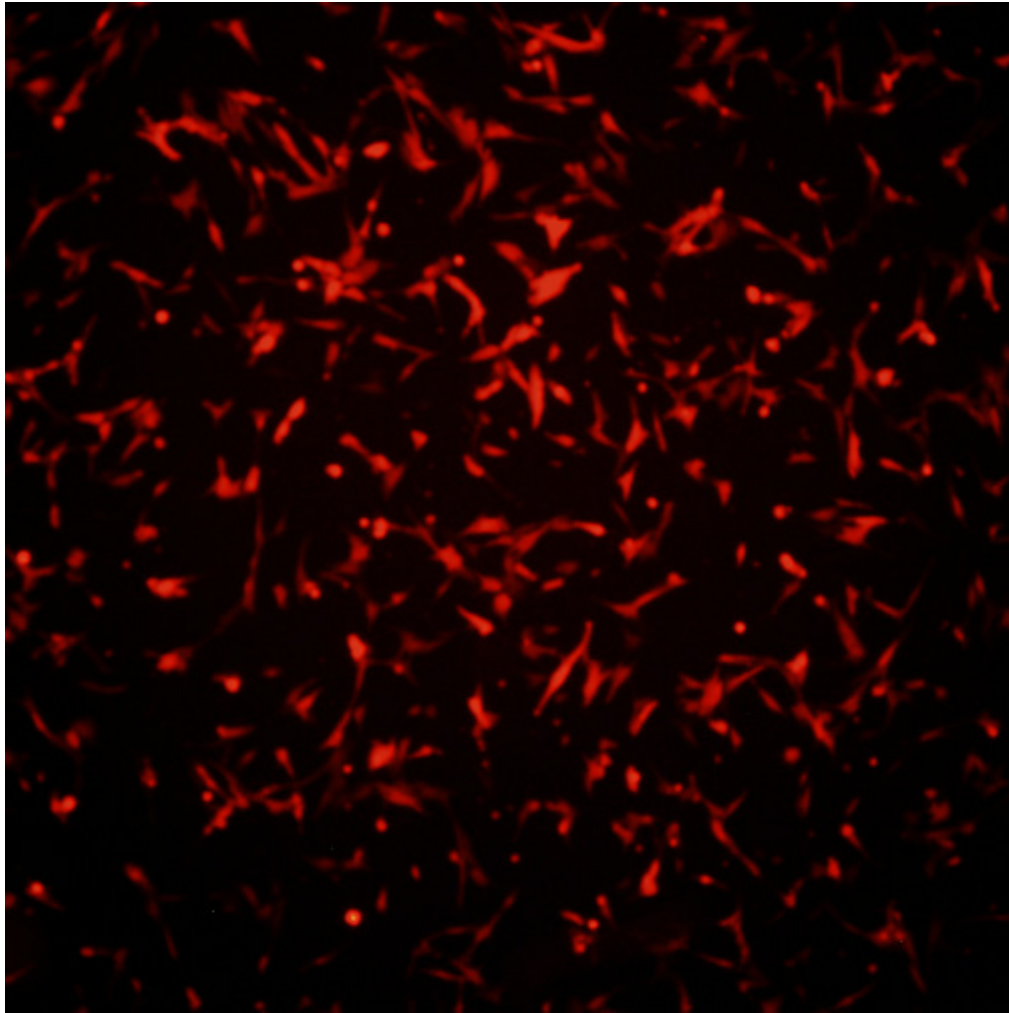

**Supplementary Figure 2: Transfection efficiency of FNDC5 interfering RNA vector in porcine myoblasts.** Red color indicates that myoblasts have been transfected with the vector.

**Supplementary Table 1: Primers for RT-PCR analysis in meishan pigs**

| <b>Genes</b>   | <b>Forward primers</b>    | <b>Reverse primers</b> |
|----------------|---------------------------|------------------------|
| UCP2           | AGTGTGAGACCTGACGAAGC      | CCTTTCTCCCTGGATCTGC    |
| UCP3           | CAACAGGAAGTACAGCGGGA      | CACCATCTCGGCACAGTTCA   |
| PGC-1 $\alpha$ | CACCAGCCAACACTCAGCTA      | GAGGTGCACTTGTCTCTGCT   |
| PRDM16         | TACACGTGCAGGTACTGTGG      | GAGGTGTCTGTCCAGGTTGG   |
| Cidea          | GGGAGATAAAGGGTCAGCGTG     | AAGCAGAGATGAAGAGGAAGCA |
| CD137          | AAACAACCGTTTCTGAAGCCAG    | TCAAGAGAGTCCCAGCACCT   |
| Tmem26         | TCTACCCATTGGAGGTGGGA      | GCAGGGCTCTTCCTCACATTT  |
| InsR           | CTGCGTCACTTCACTGGCTA      | CCTCATCACCGTATCGTCGG   |
| IRS1           | AGAGGACCGTCAGTAGCTCA      | CACGATAGAGAGCGTGCAGT   |
| FNDC5          | TGCAGGCCATCTCCATTCAG      | ATATTGGCGGCAGAAGAGGG   |
| TBP1           | AACAGTTCAGTAGTTATGAGCCAGA | AGATGTTCTCAAACGCTTCG   |
